# Supplementary material for: Extraordinary Titer and Broad Anti-SARS-CoV-2 Neutralization Induced by Stabilized RBD Nanoparticles from Strain BA.5
Source: MDPI journal article supplement (doi:10.3390/vaccines12010037), 2023-12-28
Supplement: s1 [file s1]

**Table S1.** Amino acid sequences of constructs for protein expression. scFc sequences highlighted in blue, and RBD/RBD-Stab-SpyT sequences highlighted in purple.

| Construct name     | Amino acid sequence                                                                                                                                                                                                                                                                                                                                                                                                                                                                                                                                                                                                                                                                                                                                                                              |
|--------------------|--------------------------------------------------------------------------------------------------------------------------------------------------------------------------------------------------------------------------------------------------------------------------------------------------------------------------------------------------------------------------------------------------------------------------------------------------------------------------------------------------------------------------------------------------------------------------------------------------------------------------------------------------------------------------------------------------------------------------------------------------------------------------------------------------|
| Encapsulin-DS-SpyC | MEFLKRSFAPLTEKQWQEIDNRAREIFKTKLYGRKFVDVEGGGGGHHHHHHGGGGGPPYGWEYAAHP<br>LCEVEVLSDENEVVKWGLRKLSPLELRATFTLLWELDNLECGKPNVDLSSLEETVRKVAEFEDEVIFRG<br>CEKSGVKGLLSFEERKIECGSTPKDLLEAIVRALSIFSCKDIEGPYTLVINTDRWINFLKEEAGHYPLEKR<br>VEECLRGGKIITTPRIEDALVVSERGGDFKLILGQDLSIGYEDREKDAVRLFITETFTMLLKFGSGSGSVT<br>TLSGLSGEQGPSGDMTTEEDSATHIKFSKRDEDEGRELATMELRDSSGKISTWISDGHVKDFLYLP<br>GKYTFVETAAPDGYEVATAITFTVNEQGQVTVNGEATKGAHTGSSGS                                                                                                                                                                                                                                                                                                                                                                      |
| WA1-RBD-SpyT       | MGWSCILFLVATATGVHSAPELLGGPSVFLFPPKPKDTLMISRTPEVTCVVVDVSHEDPEVKFNWYVD<br>GVEVHNAKTKPREEQYNSTYRVVSVLTVLHQDWLNGKEYKCKVSNKALPAPIEKTISKAKGQPREPQV<br>YTLPPSRDELTKNQVSLYCLVKGFYPSDIAVEWESNGQPENNYKTPPVLDSDGSFFLYSKLTVDKSR<br>WQQGNVFSCSVMHEALHNHYTQKSLSLSPGKGGGGSGGGGSGGGGSGGGGSAPELLGGPSVFLFP<br>PKPKDTLMISRTPEVTCVVVDVSHEDPEVKFNWYVDGVEVHNAKTKPREEQYNSTYRVVSVLTVLHQD<br>WLNGKEYKCKVSNKALPAPIEKTISKAKGQPREPQVYTLPPSRDELTKNQVSLTCLVKGFYPSDIAVEW<br>ESNGQPENNYKTPPVLDSDGSFFLTSLKLTVDKSRWQQGNVFSCSVMHEALHNHYTQKSLSLSPGKG<br>GSGGGGSGGLEVLFQGP AHIVMVDAYKPTKGGSGGSGGRVQPTESIVRFPNITNLCPFGEVFNATRFA<br>SVYAWNRRKRISNCVADYSLYNASFSFTKCYGVSPTKLNDLCFTNVYADSFVIRGDEVRIAPGQTGK<br>IADYNYKLPPDFTGCVIAWNSNNLDSKVGGNYNYLYRLFRKSNLKPFERDISTEIQAGSTPCNGVEGF<br>NCYFPLQSYGFQPTNGVGYPYRVVLSFELLHAPATVCGPKKSTNLVKNK    |
| BA.5-RBD-SpyT      | MGWSCILFLVATATGVHSAPELLGGPSVFLFPPKPKDTLMISRTPEVTCVVVDVSHEDPEVKFNWYVD<br>GVEVHNAKTKPREEQYNSTYRVVSVLTVLHQDWLNGKEYKCKVSNKALPAPIEKTISKAKGQPREPQV<br>YTLPPSRDELTKNQVSLYCLVKGFYPSDIAVEWESNGQPENNYKTPPVLDSDGSFFLYSKLTVDKSR<br>WQQGNVFSCSVMHEALHNHYTQKSLSLSPGKGGGGSGGGGSGGGGSGGGGSAPELLGGPSVFLFP<br>PKPKDTLMISRTPEVTCVVVDVSHEDPEVKFNWYVDGVEVHNAKTKPREEQYNSTYRVVSVLTVLHQD<br>WLNGKEYKCKVSNKALPAPIEKTISKAKGQPREPQVYTLPPSRDELTKNQVSLTCLVKGFYPSDIAVEW<br>ESNGQPENNYKTPPVLDSDGSFFLTSLKLTVDKSRWQQGNVFSCSVMHEALHNHYTQKSLSLSPGKG<br>GSGGGGSGGLEVLFQGP AHIVMVDAYKPTKGGSGGSGGRVQPTESIVRFPNITNLCPFDEVFNATRFA<br>SVYAWNRRKRISNCVADYSLYNFAPFFAFKCYGVSPTKLNDLCFTNVYADSFVIRGNEVSQIAPGQTGN<br>IADYNYKLPPDFTGCVIAWNSNKLDSKVGGNYNYLYRLFRKSNLKPFERDISTEIQAGNKPCNGVAGV<br>NCYFPLQSYGFRPTYGVGHQPYRVVLSFELLHAPATVCGPKKSTNLVKNK |
| WA1-RBD-Stab-SpyT  | MGWSCILFLVATATGVHSAPELLGGPSVFLFPPKPKDTLMISRTPEVTCVVVDVSHEDPEVKFNWYVD<br>GVEVHNAKTKPREEQYNSTYRVVSVLTVLHQDWLNGKEYKCKVSNKALPAPIEKTISKAKGQPREPQV<br>YTLPPSRDELTKNQVSLYCLVKGFYPSDIAVEWESNGQPENNYKTPPVLDSDGSFFLYSKLTVDKSR<br>WQQGNVFSCSVMHEALHNHYTQKSLSLSPGKGGGGSGGGGSGGGGSGGGGSAPELLGGPSVFLFP<br>PKPKDTLMISRTPEVTCVVVDVSHEDPEVKFNWYVDGVEVHNAKTKPREEQYNSTYRVVSVLTVLHQD<br>WLNGKEYKCKVSNKALPAPIEKTISKAKGQPREPQVYTLPPSRDELTKNQVSLTCLVKGFYPSDIAVEW<br>ESNGQPENNYKTPPVLDSDGSFFLTSLKLTVDKSRWQQGNVFSCSVMHEALHNHYTQKSLSLSPGKG<br>GSGGGGSGGLEVLFQGP AHIVMVDAYKPTKGGSGGSGGRVQPTESIVRFPNIMNLCPFGEVFNATRF<br>PSVYAWNRRKRISNCYYDYSVLYNASFSFTKCYGVSPTKLNDLCFTQVFADSFVIRGDEVRIAPGQTG<br>KIADYNYKLPPDFTGCVIAWNSNNLDSKVGGNYNYLYRLFRKSNLKPFERDSTEIQAGSTPCNGVEG<br>FNCYFPLQSYGFQPTNGVGYPYRVVLSFELLDAPPTVCGPKKSTNLVKNK    |
| BA.5-RBD-Stab-SpyT | MGWSCILFLVATATGVHSAPELLGGPSVFLFPPKPKDTLMISRTPEVTCVVVDVSHEDPEVKFNWYVD<br>GVEVHNAKTKPREEQYNSTYRVVSVLTVLHQDWLNGKEYKCKVSNKALPAPIEKTISKAKGQPREPQV<br>YTLPPSRDELTKNQVSLYCLVKGFYPSDIAVEWESNGQPENNYKTPPVLDSDGSFFLYSKLTVDKSR<br>WQQGNVFSCSVMHEALHNHYTQKSLSLSPGKGGGGSGGGGSGGGGSGGGGSAPELLGGPSVFLFP<br>PKPKDTLMISRTPEVTCVVVDVSHEDPEVKFNWYVDGVEVHNAKTKPREEQYNSTYRVVSVLTVLHQD<br>WLNGKEYKCKVSNKALPAPIEKTISKAKGQPREPQVYTLPPSRDELTKNQVSLTCLVKGFYPSDIAVEW<br>ESNGQPENNYKTPPVLDSDGSFFLTSLKLTVDKSRWQQGNVFSCSVMHEALHNHYTQKSLSLSPGKG<br>GSGGGGSGGLEVLFQGP AHIVMVDAYKPTKGGSGGSGGRVQPTESIVRFPNIMNLCPFDEVFNATRF<br>PSVYAWNRRKRISNCYYDYSVLYNFAPFFAFKCYGVSPTKLNDLCFTQVFADSFVIRGNEVSQIAPGQTG<br>NIADYNYKLPPDFTGCVIAWNSNKLDSKVGGNYNYLYRLFRKSNLKPFERDSTEIQAGNKPCNGVA<br>GVNCYFPLQSYGFRPTYGVGHQPYRVVLSFELLDAPPTVCGPKKSTNLVKNK |

**Table S2.** Octet binding data of different immunogens with CB6 or LY-CoV1404 antibodies.

| IgG        | Immunogen                    | KD (M)                 | KD error               | Kon (1/Ms)         | Kon error          | Koff (1/s)            | Koff error            |
|------------|------------------------------|------------------------|------------------------|--------------------|--------------------|-----------------------|-----------------------|
| CB6        | WA1-RBD-Stab                 | $4.03 \times 10^{-8}$  | $1.35 \times 10^{-9}$  | $1.31 \times 10^5$ | $4.15 \times 10^3$ | $5.27 \times 10^{-3}$ | $5.58 \times 10^{-5}$ |
| CB6        | BA5-RBD-Stab                 | No binding             |                        |                    |                    |                       |                       |
| CB6        | WA1-RBD-Stab-EnDS-NP         | $<1.0 \times 10^{-12}$ | $1.43 \times 10^{-11}$ | $2.72 \times 10^6$ | $7.70 \times 10^4$ | $<1.0 \times 10^{-7}$ |                       |
| CB6        | BA.5-RBD-Stab-EnDS-NP        | $7.84 \times 10^{-10}$ | $1.19 \times 10^{-11}$ | $7.52 \times 10^5$ | $5.23 \times 10^3$ | $5.89 \times 10^{-4}$ | $7.92 \times 10^{-6}$ |
| CB6        | Mosaic-WA1-BA.5-Stab-EnDS-NP | $<1.0 \times 10^{-12}$ | $4.01 \times 10^{-12}$ | $1.99 \times 10^6$ | $1.26 \times 10^4$ | $<1.0 \times 10^{-7}$ |                       |
| LY-CoV1404 | WA1-RBD-Stab                 | $<1.0 \times 10^{-12}$ | $1.63 \times 10^{-10}$ | $1.93 \times 10^5$ | $6.35 \times 10^3$ | $<1.0 \times 10^{-7}$ |                       |
| LY-CoV1404 | BA5-RBD-Stab                 | $<1.0 \times 10^{-12}$ | $1.77 \times 10^{-10}$ | $2.13 \times 10^5$ | $8.90 \times 10^3$ | $<1.0 \times 10^{-7}$ |                       |
| LY-CoV1404 | WA1-RBD-Stab-EnDS-NP         | $<1.0 \times 10^{-12}$ | $1.27 \times 10^{-11}$ | $3.04 \times 10^6$ | $8.48 \times 10^4$ | $<1.0 \times 10^{-7}$ |                       |
| LY-CoV1404 | BA.5-RBD-Stab-EnDS-NP        | $<1.0 \times 10^{-12}$ | $9.73 \times 10^{-12}$ | $1.05 \times 10^6$ | $8.32 \times 10^3$ | $<1.0 \times 10^{-7}$ |                       |
| LY-CoV1404 | Mosaic-WA1-BA.5-Stab-EnDS-NP | $<1.0 \times 10^{-12}$ | $1.43 \times 10^{-12}$ | $3.30 \times 10^6$ | $1.14 \times 10^4$ | $<1.0 \times 10^{-7}$ |                       |

**Table S3.** Phylogenetic distance between RBDs.

| Strain          | WA1    | BA.5   | WA1/BA.5 |
|-----------------|--------|--------|----------|
| WA1             | 0      | 0.0802 | 0        |
| BA.5            | 0.0802 | 0      | 0        |
| Delta           | 0.0091 | 0.0704 | 0.0091   |
| BA.2            | 0.0753 | 0.0137 | 0.0137   |
| BA.2.86         | 0.1256 | 0.0607 | 0.0607   |
| BQ.1.1          | 0.0951 | 0.0137 | 0.0137   |
| XBB.1.5         | 0.1052 | 0.0416 | 0.0416   |
| EG.5.1          | 0.1102 | 0.0464 | 0.0464   |
| FL.1.5.1        | 0.1102 | 0.0511 | 0.0511   |
| SARS-1          | 0.3197 | 0.3652 | 0.3197   |
| WIV1            | 0.2886 | 0.352  | 0.2886   |
| Pangolin_GX P2V | 0.1465 | 0.2008 | 0.1465   |

|          |                    |                                                                |     |
|----------|--------------------|----------------------------------------------------------------|-----|
| <b>A</b> | Consensus          | GPAHIVMVDAYKPTKGGSGGSGGRVQPTESIVRFPNIXNLCPFGEVFNATRFXSIVYAWNR  | 60  |
|          | WA1-RBD-SpyT       | .....T.....A.....                                              | 60  |
|          | WA1-RBD-Stab-SpyT  | .....M.....P.....                                              | 60  |
|          | Consensus          | KRISNCXXDYSVLYNSASFSTFKCYGVSP TKLNDLCFTXVXADSFVIRGDEV RQIAPGQT | 120 |
|          | WA1-RBD-SpyT       | .....VA.....N.Y.....                                           | 120 |
|          | WA1-RBD-Stab-SpyT  | .....YY.....Q.F.....                                           | 120 |
|          | Consensus          | GKIADYNYKLPDDFTGCVIAWNSNNLDSKVG GNYNYLYRLFRKSNLKPFERDXSTEIYQA  | 180 |
|          | WA1-RBD-SpyT       | .....I.....                                                    | 180 |
|          | WA1-RBD-Stab-SpyT  | .....T.....                                                    | 180 |
|          | Consensus          | GSTPCNGVEGFNCYFPLQSYGFQPTNGVG YQPYRVVLSFELLXAPXTVCGPKKSTNLVK   | 240 |
|          | WA1-RBD-SpyT       | .....H..A.....                                                 | 240 |
|          | WA1-RBD-Stab-SpyT  | .....D..P.....                                                 | 240 |
|          | Consensus          | NK                                                             | 242 |
|          | WA1-RBD-SpyT       | ..                                                             | 242 |
|          | WA1-RBD-Stab-SpyT  | ..                                                             | 242 |
| <b>B</b> | Consensus          | GPAHIVMVDAYKPTKGGSGGSGGRVQPTESIVRFPNIXNLCPFDEVFNATRFXSIVYAWNR  | 60  |
|          | BA.5-RBD-SpyT      | .....T.....A.....                                              | 60  |
|          | BA.5-RBD-Stab-SpyT | .....M.....P.....                                              | 60  |
|          | Consensus          | KRISNCXXDYSVLYNFAPFFAFKCYGVSP TKLNDLCFTXVXADSFVIRGNEVSQIAPGQT  | 120 |
|          | WA1-RBD-SpyT       | .....VA.....N.Y.....                                           | 120 |
|          | WA1-RBD-Stab-SpyT  | .....YY.....Q.F.....                                           | 120 |
|          | Consensus          | GNIADYNYKLPDDFTGCVIAWNSNKLDSKVG GNYNYRYRLFRKSNLKPFERDXSTEIYQA  | 180 |
|          | WA1-RBD-SpyT       | .....I.....                                                    | 180 |
|          | WA1-RBD-Stab-SpyT  | .....T.....                                                    | 180 |
|          | Consensus          | GNKPCNGVAGVNCYFPLQSYGFRPTYGVGH QPYRVVLSFELLXAPXTVCGPKKSTNLVK   | 240 |
|          | WA1-RBD-SpyT       | .....H..A.....                                                 | 240 |
|          | WA1-RBD-Stab-SpyT  | .....D..P.....                                                 | 240 |
|          | Consensus          | NK                                                             | 242 |
|          | WA1-RBD-SpyT       | ..                                                             | 242 |
|          | WA1-RBD-Stab-SpyT  | ..                                                             | 242 |

**Figure S1.** Amino acid sequence alignment of different RBD constructs. (A) WA1-RBD-SpyT and WA1-Stab-RBD-SpyT protein alignment. (B) BA.5-RBD-SpyT and BA.5-Stab-RBD-SpyT protein alignment.

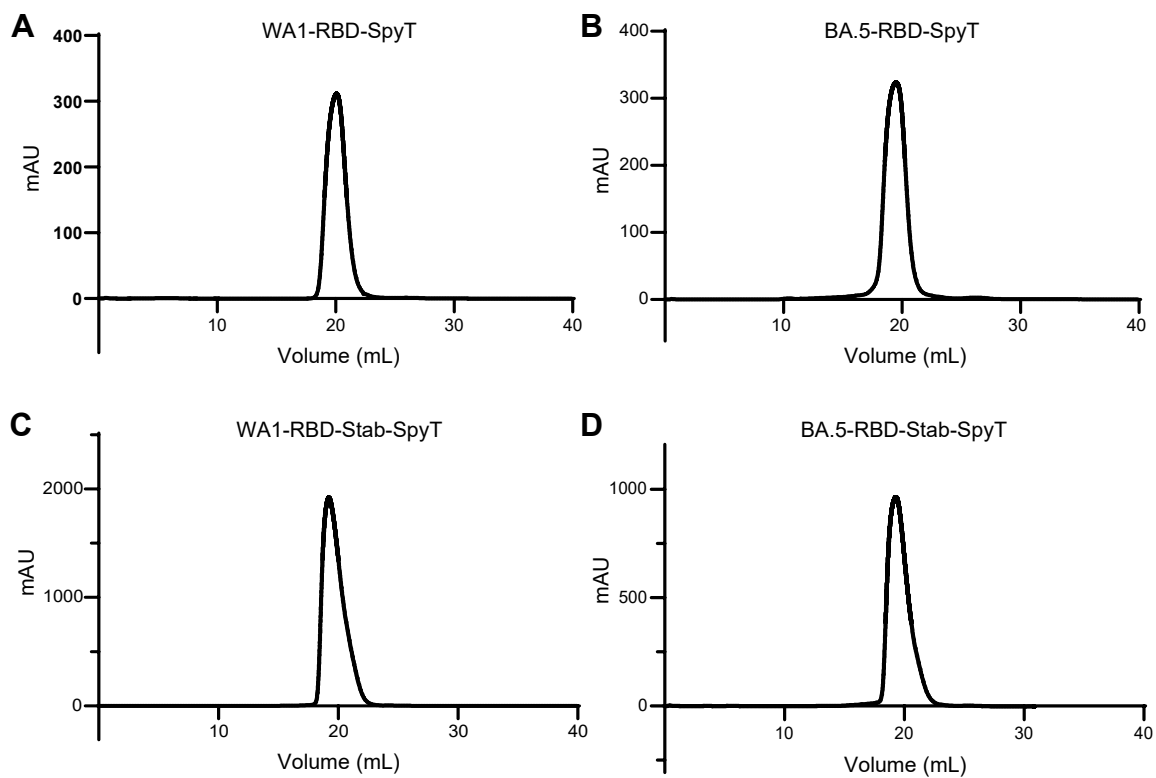

**Figure S2.** High purity RBD-SpyT proteins produced for nanoparticle preparation. SEC profiles of WA1-RBD-SpyT (A), BA.5-RBD-SpyT (B), WA1-RBD-Stab-SpyT (C), and BA.5-RBD-Stab-SpyT (D).

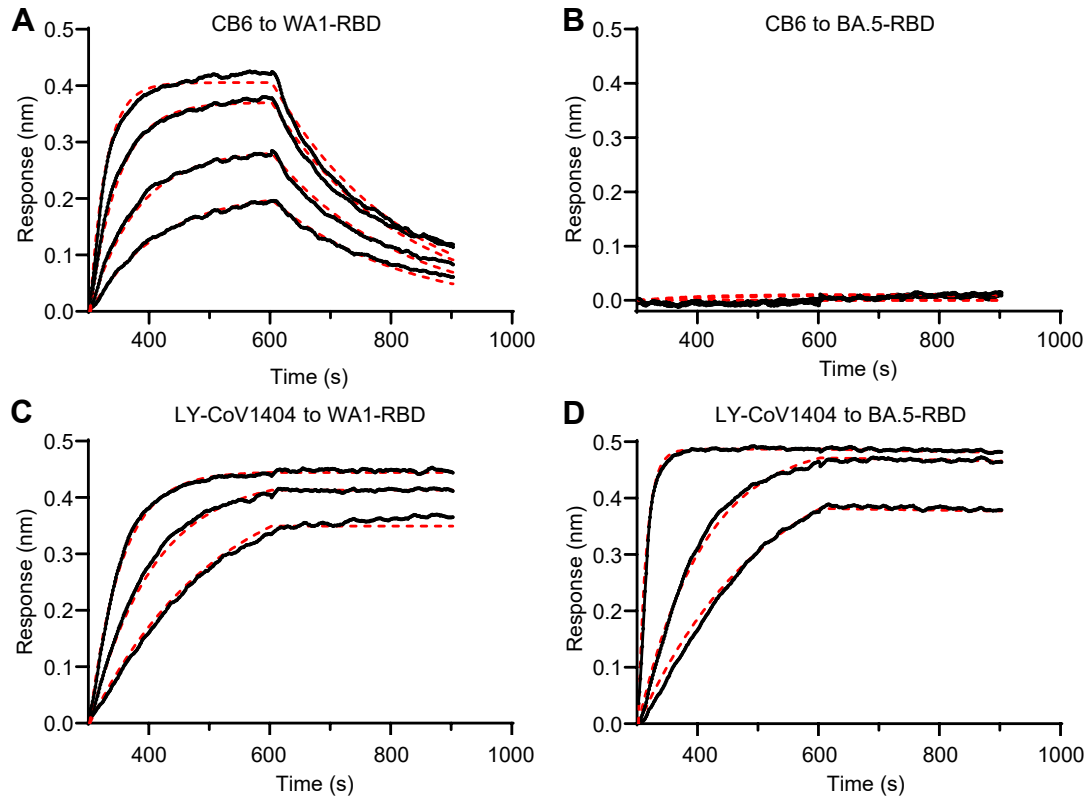

**Figure S3.** Antigenic analysis of different RBD proteins. (A-D) BLI measurements are shown in black with fitting provided with dotted red lines. (A) Antigenic data with CB6 antibody dipped into WA1-RBD. (B) Antigenic data with CB6 antibody dipped into BA.5-RBD. (C) Antigenic data with LY-CoV1404 antibody dipped into WA1-RBD. (D) Antigenic data with LY-CoV1404 antibody dipped into BA.5-RBD.

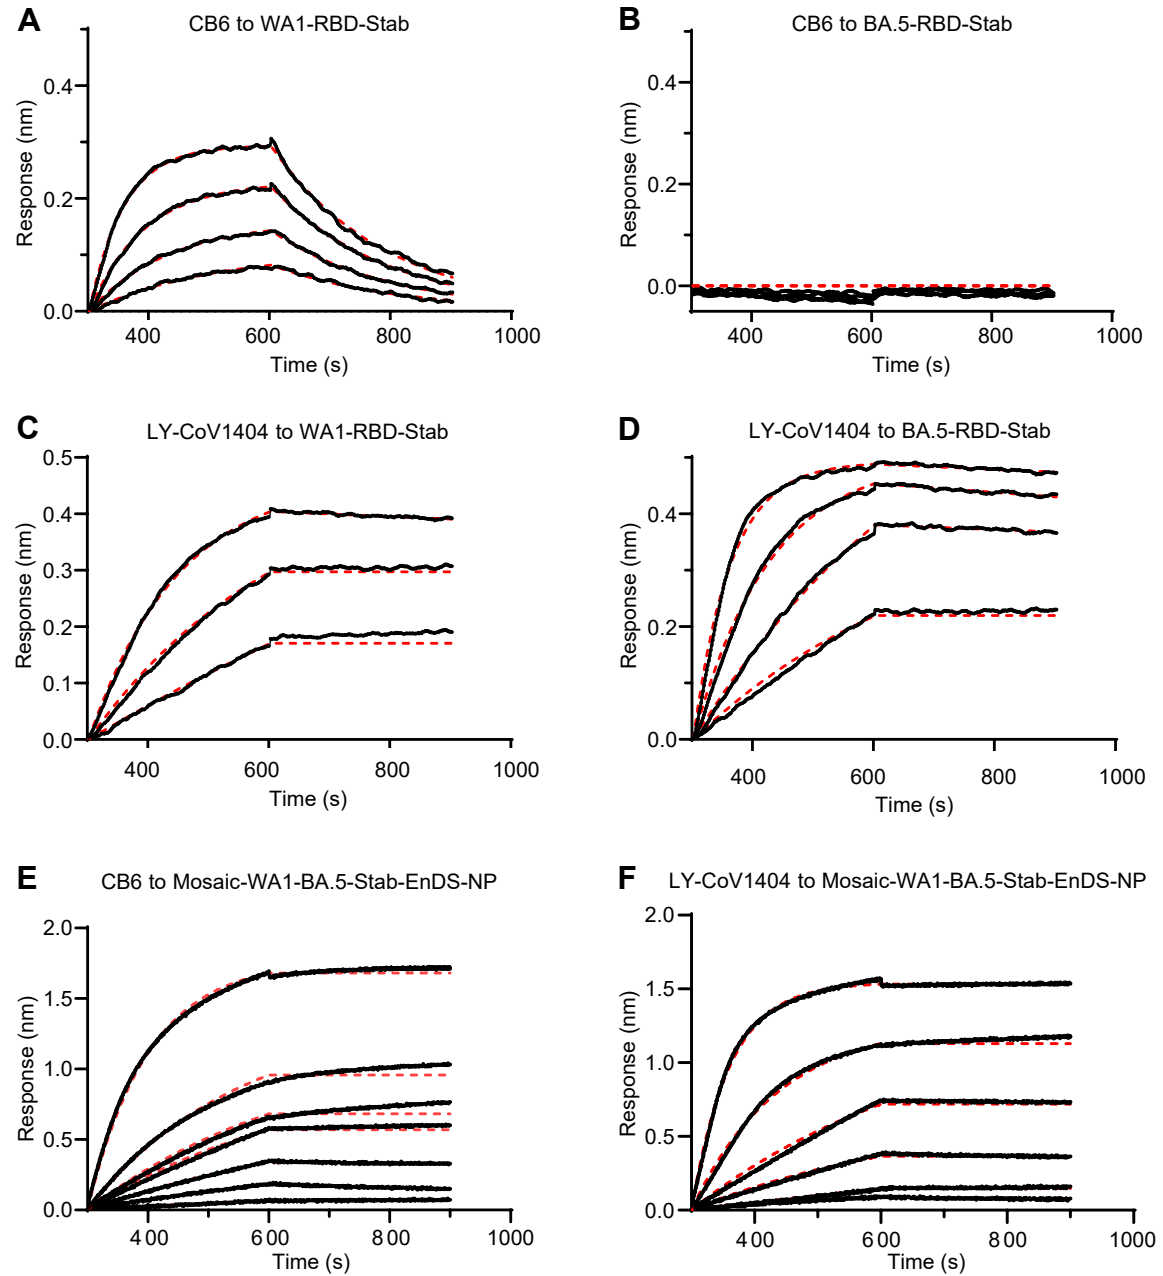

**Figure S4.** Antigenic analysis of different RBD proteins and Mosaic-WA1-BA.5-Stab-EnDS-NP. (A-F) BLI measurements are shown in black with fitting provided with dotted red lines. (A) Antigenic data with CB6 antibody dipped into WA1-RBD-Stab. (B) Antigenic data with CB6 antibody dipped into BA.5-RBD-Stab. (C) Antigenic data with LY-CoV1404 antibody dipped into WA1-RBD-Stab. (D) Antigenic data with LY-CoV1404 antibody dipped into BA.5-RBD-Stab. (E) Antigenic data with CB6 antibody dipped into Mosaic-WA1-BA.5-Stab-EnDS-NP. (F) Antigenic data with LY-CoV1404 antibody dipped into Mosaic-WA1-BA.5-Stab-EnDS-NP.

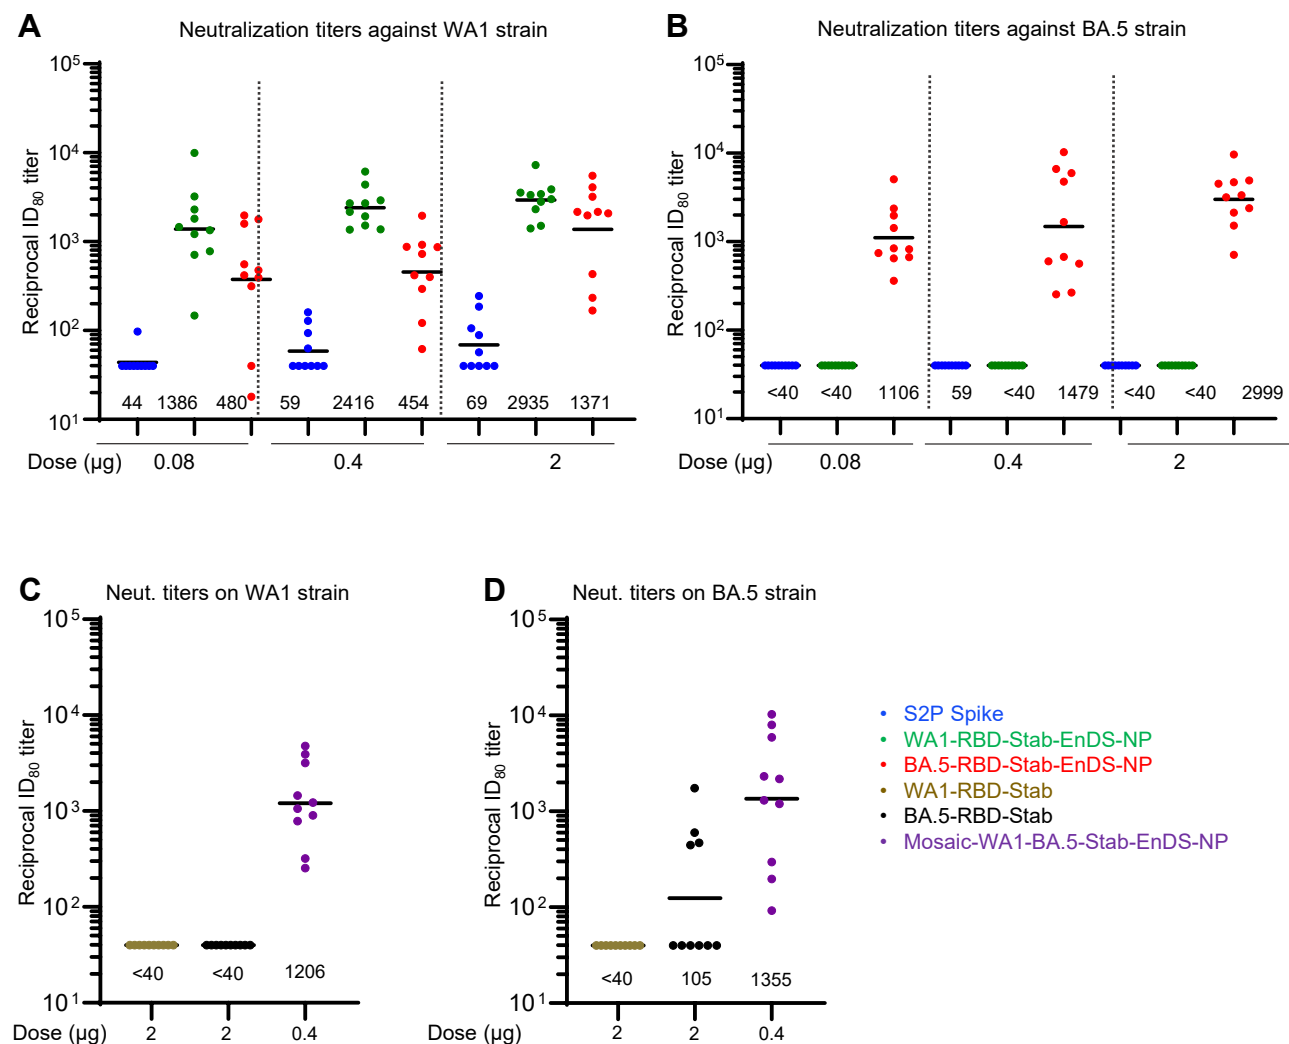

**Figure S5.** Immunization of stabilized RBD-EnDS nanoparticles elicited strong anti-SARS-CoV-2 pseudovirus neutralizing responses in mice. (A) Anti-SARS-CoV-2 WA1 pseudovirus neutralization ID80 titers from different immunogens. (B) Anti-SARS-CoV-2 BA.5 pseudovirus neutralization ID80 titers from different immunogens. (C) Anti-SARS-CoV-2 WA1 pseudovirus neutralization ID80 titers from different immunogens. (D) Anti-SARS-CoV-2 BA.5 pseudovirus neutralization ID80 titers from different immunogens.



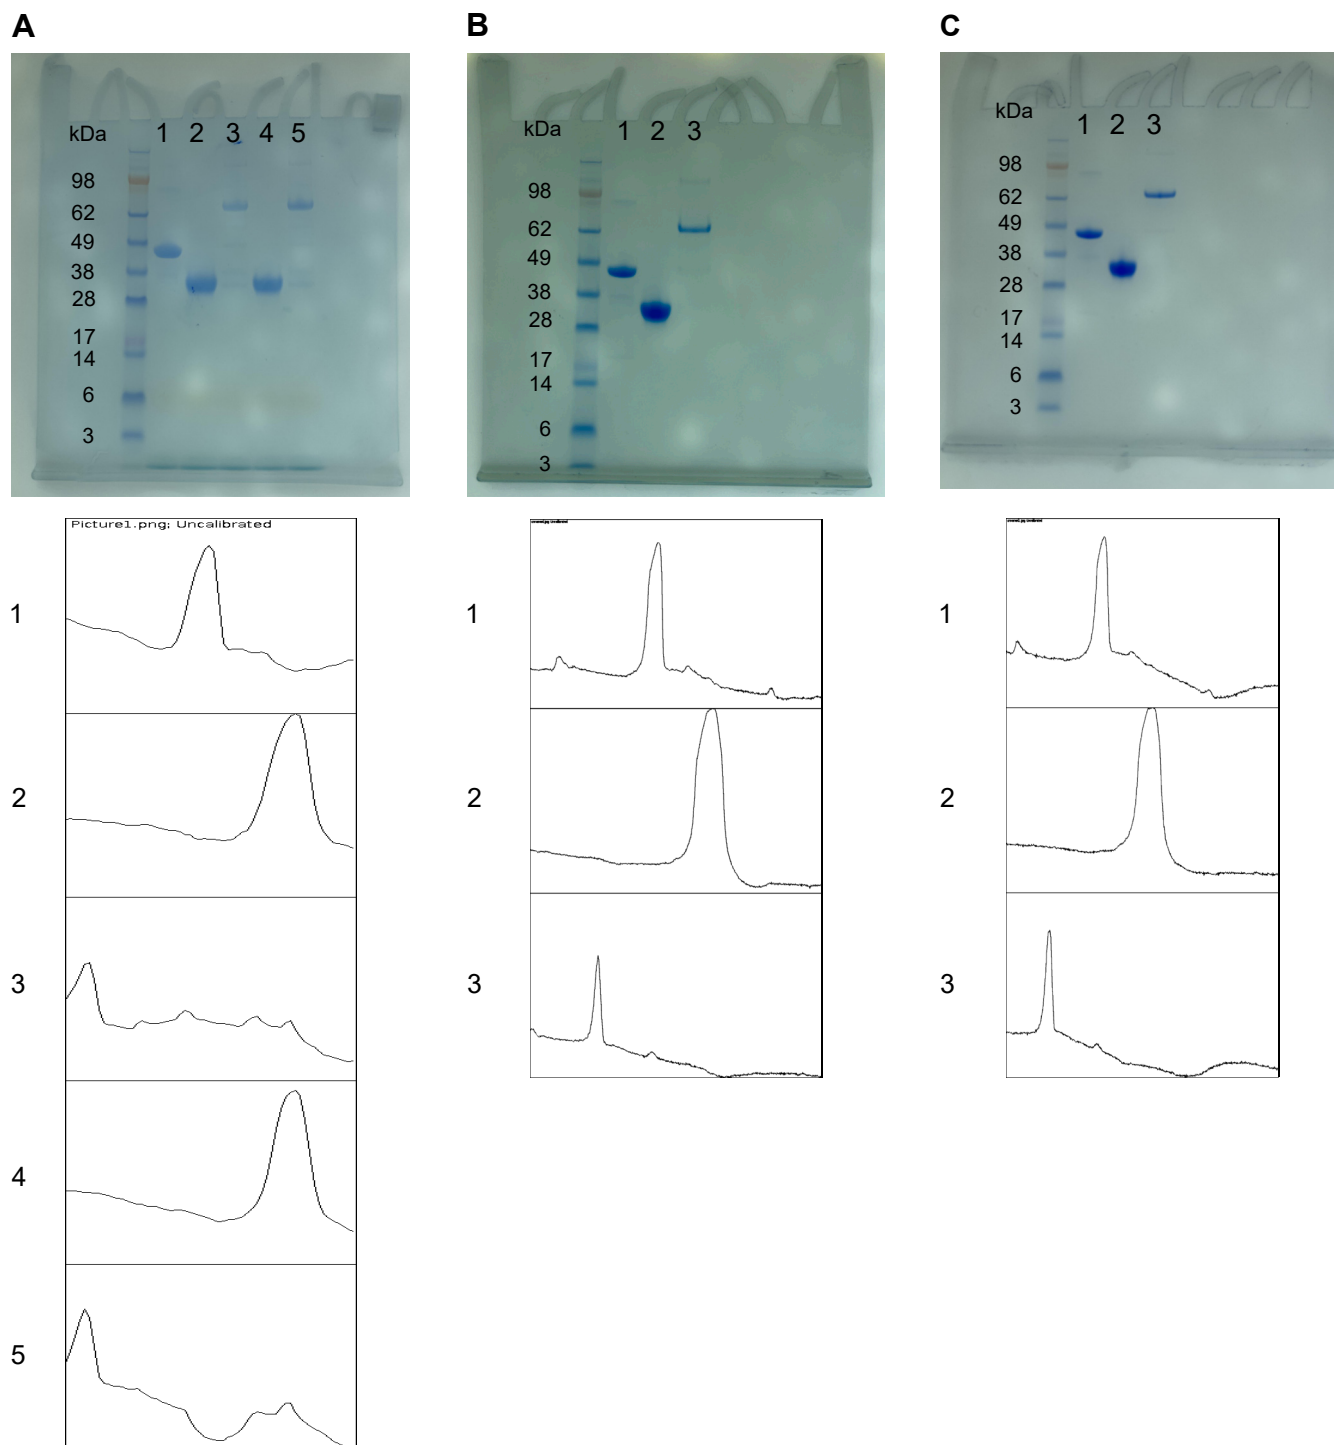

**Figure S6.** Uncropped SDS-PAGE images and densitometry readings of each lane. (A) Uncropped image of Figure 1C and densitometry readings of each lane. (B) Uncropped image of Figure 3E and densitometry readings of each lane. (C) Uncropped image of Figure 3F and densitometry readings of each lane. Molecular weight markers are shown to the left of each gel.
